# Supplementary material for: β-Sitosterol protects against food allergic response in BALB/c mice by regulating the intestinal barrier function and reconstructing the gut microbiota structure
Source: Royal Society of Chemistry journal article supplement (doi:10.1039/d3fo00772c), 2023-01-01
Supplement: d3fo00772c1.pdf [file d3fo00772c1.pdf]

**Supplementary table 1.** The composition of standard diets fed to mice. (g/100 g).

| Crude protein | Crude fat | Crude fiber | Crude ash | Moisture | Lysine | Calcium   | Phosphorus | Salts     |
|---------------|-----------|-------------|-----------|----------|--------|-----------|------------|-----------|
| ≥ 18.00       | ≥ 4.00    | ≤ 5.00      | ≤ 8.00    | ≤ 10.00  | ≥ 0.82 | 1.00-1.80 | 0.60-1.20  | 0.30-0.80 |
